# Supplementary material for: Bio-inspired interfacial chemistry for the fabrication of a robust and functional graphene oxide composite film
Source: Royal Society of Chemistry journal article supplement (doi:10.1039/d3ra08932k), 2024-01-01
Supplement: d3ra08932k1.pdf [file d3ra08932k1.pdf]

## Supporting Information

# Bio-inspired interfacial chemistry for the fabrication of a robust and functional graphene oxide composite film

*Yoo-Bin Kwon,<sup>a</sup> Seongwon Cho,<sup>b</sup> Dal-Hee Min,<sup>a\*</sup> and Young-Kwan Kim<sup>b\*</sup>*

<sup>a</sup>Department of Chemistry, Seoul National University, Seoul 08826, Republic of Korea

<sup>b</sup>Department of Chemistry, Dongguk University, 30 Pildong-ro, Jung-gu, Seoul, 04620, Republic of Korea

\* To whom correspondence should be addressed.

Prof. Dal-Hee Min, E-mail: dalheemin@snu.ac.kr

Prof. Young-Kwan Kim, E-mail: kimyk@dongguk.edu

## Supporting figures

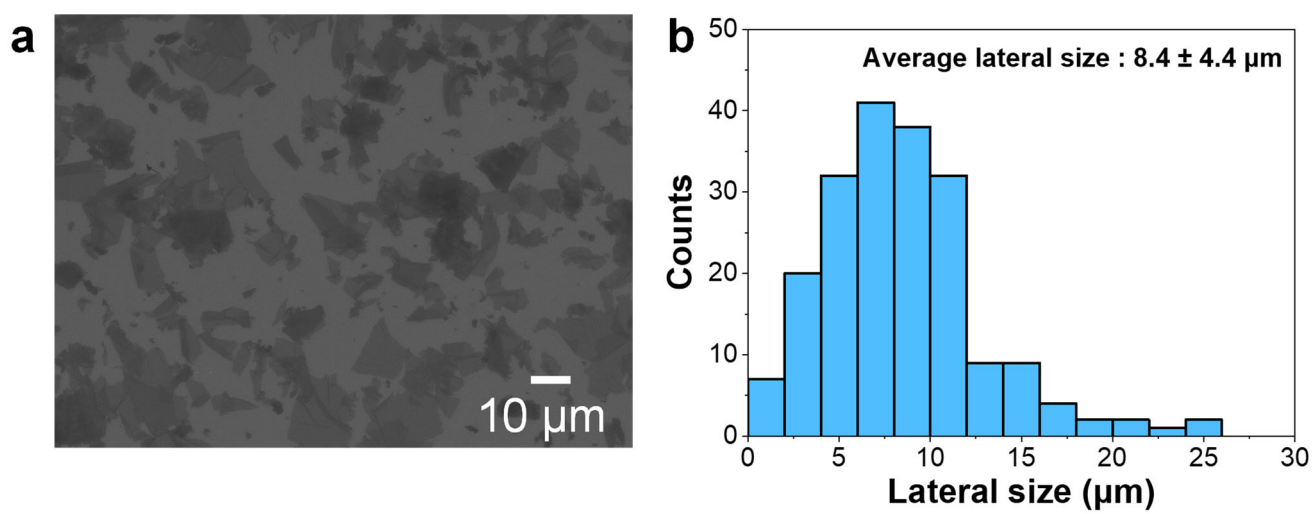

**Fig. S1** (a) SEM image and (b) lateral size distribution of GO.

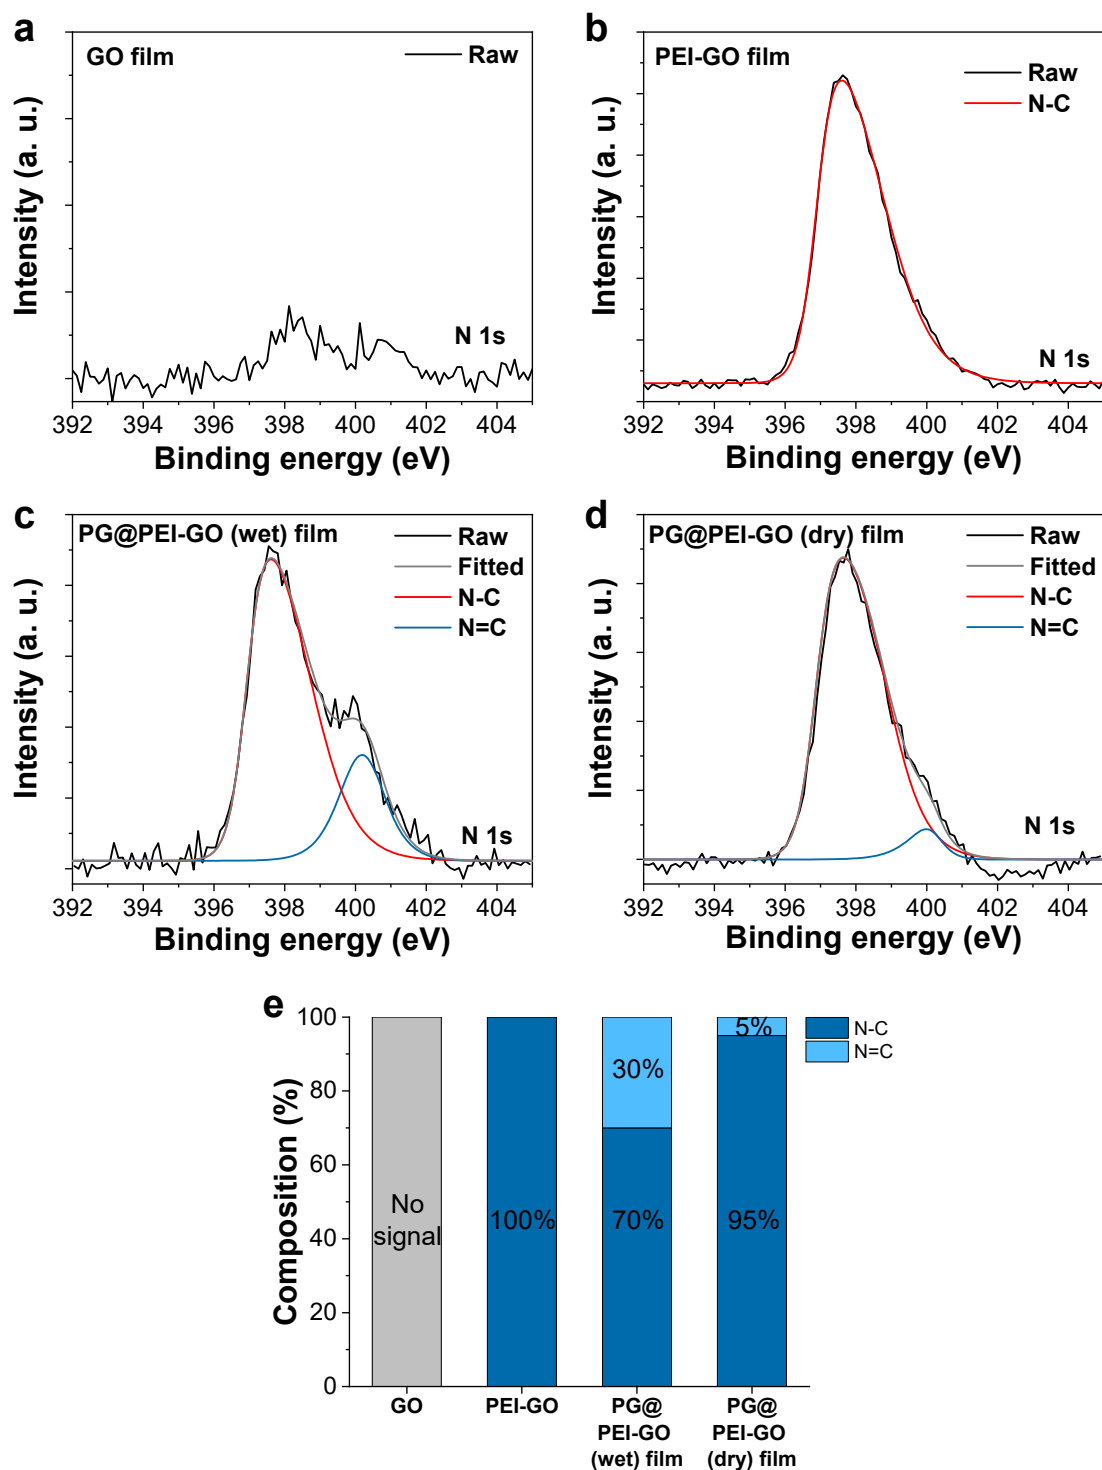

**Fig. S2** N 1s XPS spectra of (a) GO, (b) PEI-GO, (c) PG@PEI-GO (wet), and (d) PG@PEI-GO (dry) films and (e) composition of N-C and N=C in those films.

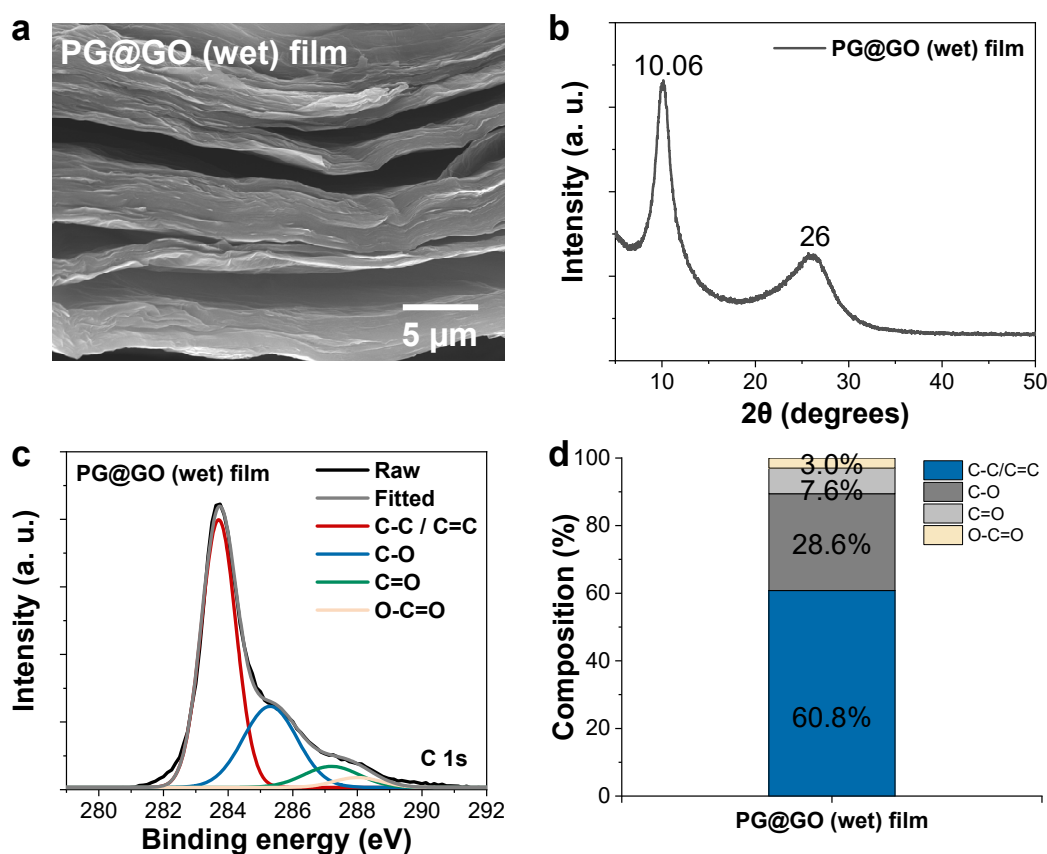

**Fig. S3** (a) Cross-sectional SEM images, (b) XRD pattern, (c) C 1s XPS spectra of PG@GO (wet) film, and (d) composition C-C/C=C, C-O, C=O, and O-C=O bonds in PG@GO (wet) film. PG@GO films were fabricated by wet method as a control group. The cross-sectional SEM image of PG@GO (wet) film showed that they were successfully assembled into the nacre-like films. The XRD and XPS analysis was further performed on PG@GO (wet) films to elucidate their assembled and chemical structures. In their XRD pattern, the (001) diffraction peak of PG@GO (wet) films shifted from  $2\theta = 10.36^\circ$  to  $10.08^\circ$  corresponding to d-spacing of 8.53 Å to 8.76 Å. The shift of (001) diffraction peak was due to the intercalated PG in the interlayer of GO films, leading to the enlarged d-spacing between GO sheets. Then, a new band was observed at  $2\theta = 26^\circ$  corresponding to d-spacing of 3.42 Å, which originated from the reduced interlayer distance of GO sheets due to the deoxygenation of GO by intrinsic reducing property of PG. In C 1s XPS analysis, PG@GO (wet) films showed typical peaks at 283.7 eV from C-C and C=C bonds (60.8%), 285.8 eV from C-O bonds (28.6%), 287.2 eV from C=O bonds (7.6%), and 288.2 eV from O-C=O bonds (3%). As a result of PG introduction, the composition of oxygen containing bonds decreased, implying the GO was reduced by PG, and it was well-matched with the results of XRD analysis.

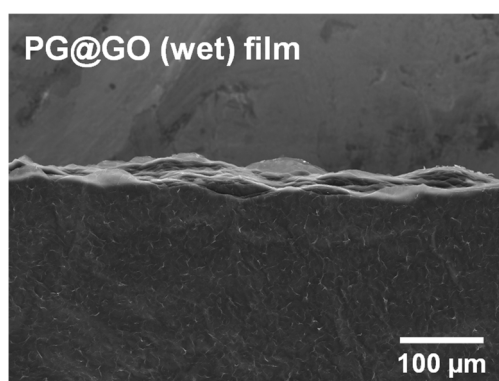

**Fig. S4** SEM image of tensile-fractured films of PG@GO (wet) film.

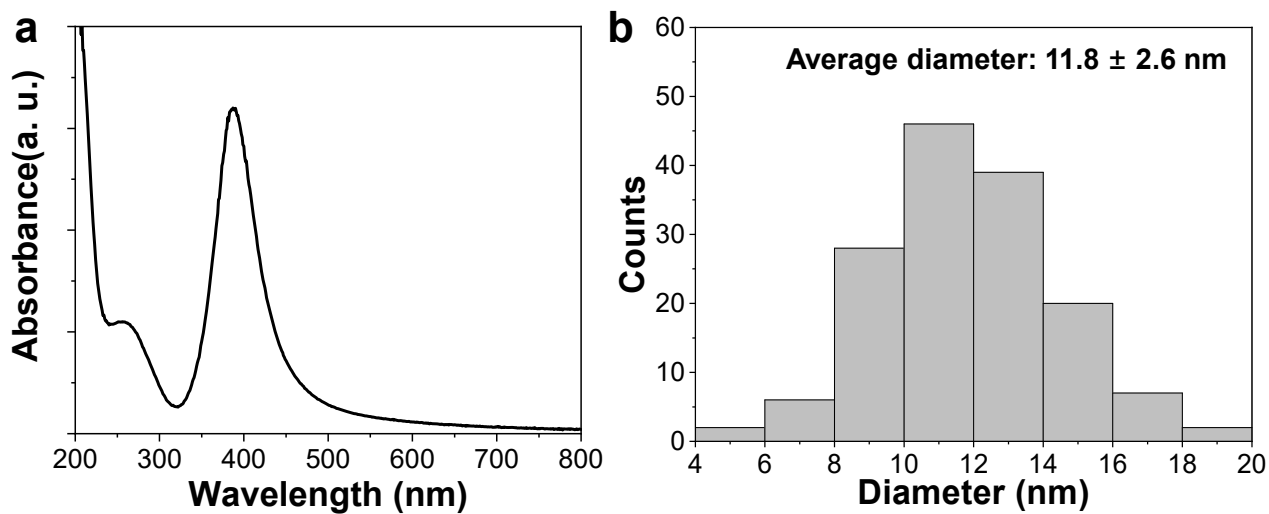

**Fig. S5** (a) UV-vis spectrum and (b) diameter histogram of AgNPs. The AgNPs exhibited a typical localized surface plasmon resonance (LSPR) band at around 390 nm and have spherical shape with an average diameter of  $11.8 \pm 2.6$  nm.

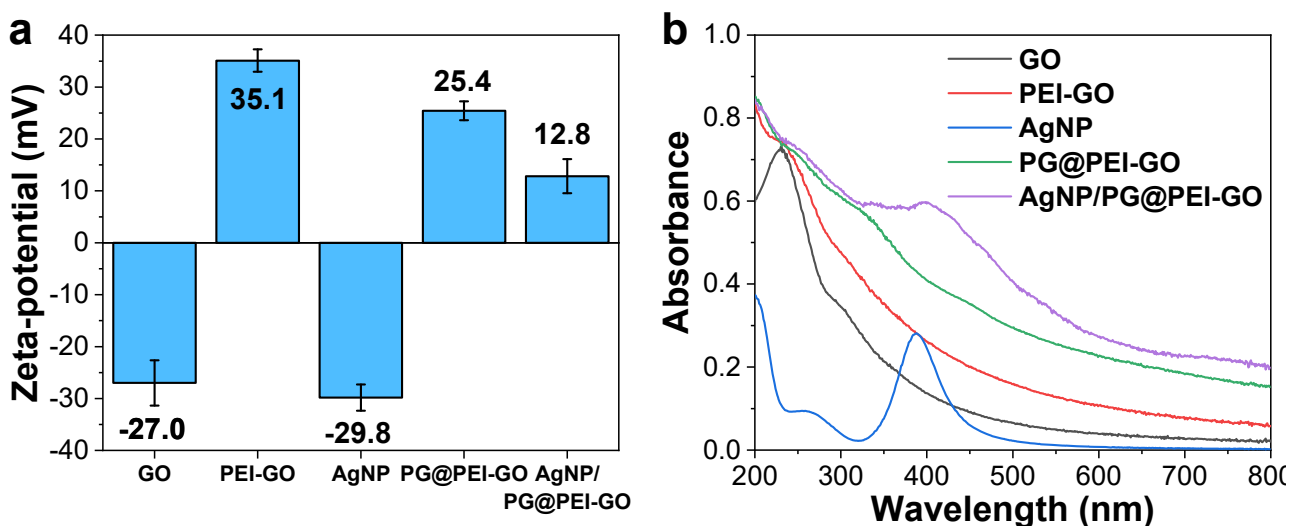

**Fig. S6** (a) zeta-potential values and (b) UV-vis spectra of GO, PEI-GO, AgNP, PG@PEI-GO, and AgNP/PG@PEI-GO. The absorbance of PEI-GO in UV region increased after reaction with PG, indicating the increase of aromatic structure through formation of a polyphenol-like structures on its surface through Schiff-base reaction. The synthesized AgNPs has a typical localized surface plasmon resonance (LSPR) band at 390 nm. After incubation of PG@PEI-GO with AgNPs, the resulting AgNP/PG@PEI-GO showed analogous UV-Vis spectrum to PG@PEI-GO except a broad absorption band at around 425 nm which was derived from the slight aggregation and dielectric constant change of AgNPs on the surface of PG@PEI-GO. This result clearly indicated that AgNPs were successfully immobilized on the surface of PG@PEI-GO.

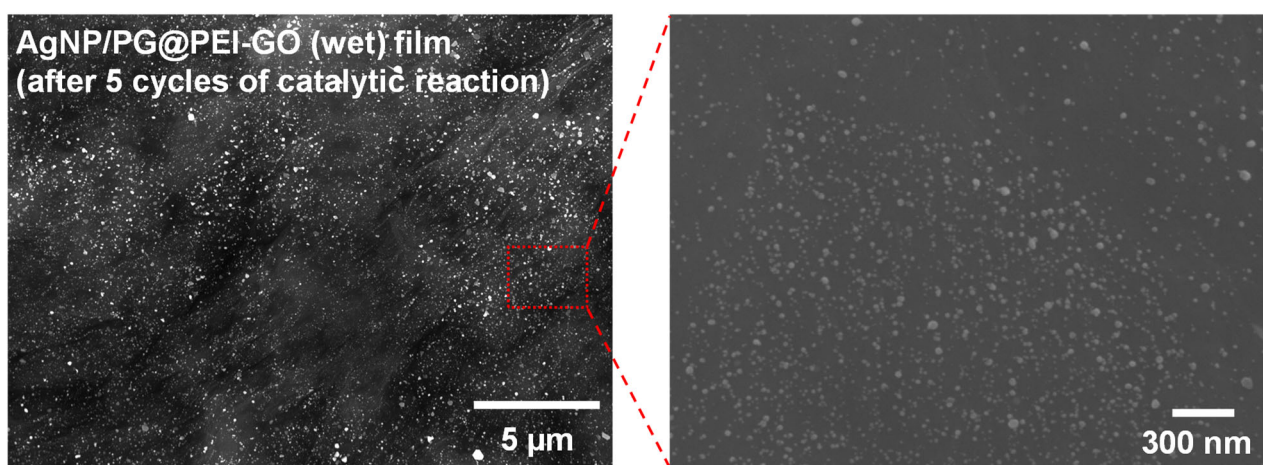

**Fig. S7** SEM images of AgNP/PG@PEI-GO (wet) film after 5 cycles of catalytic reaction with different magnifications.



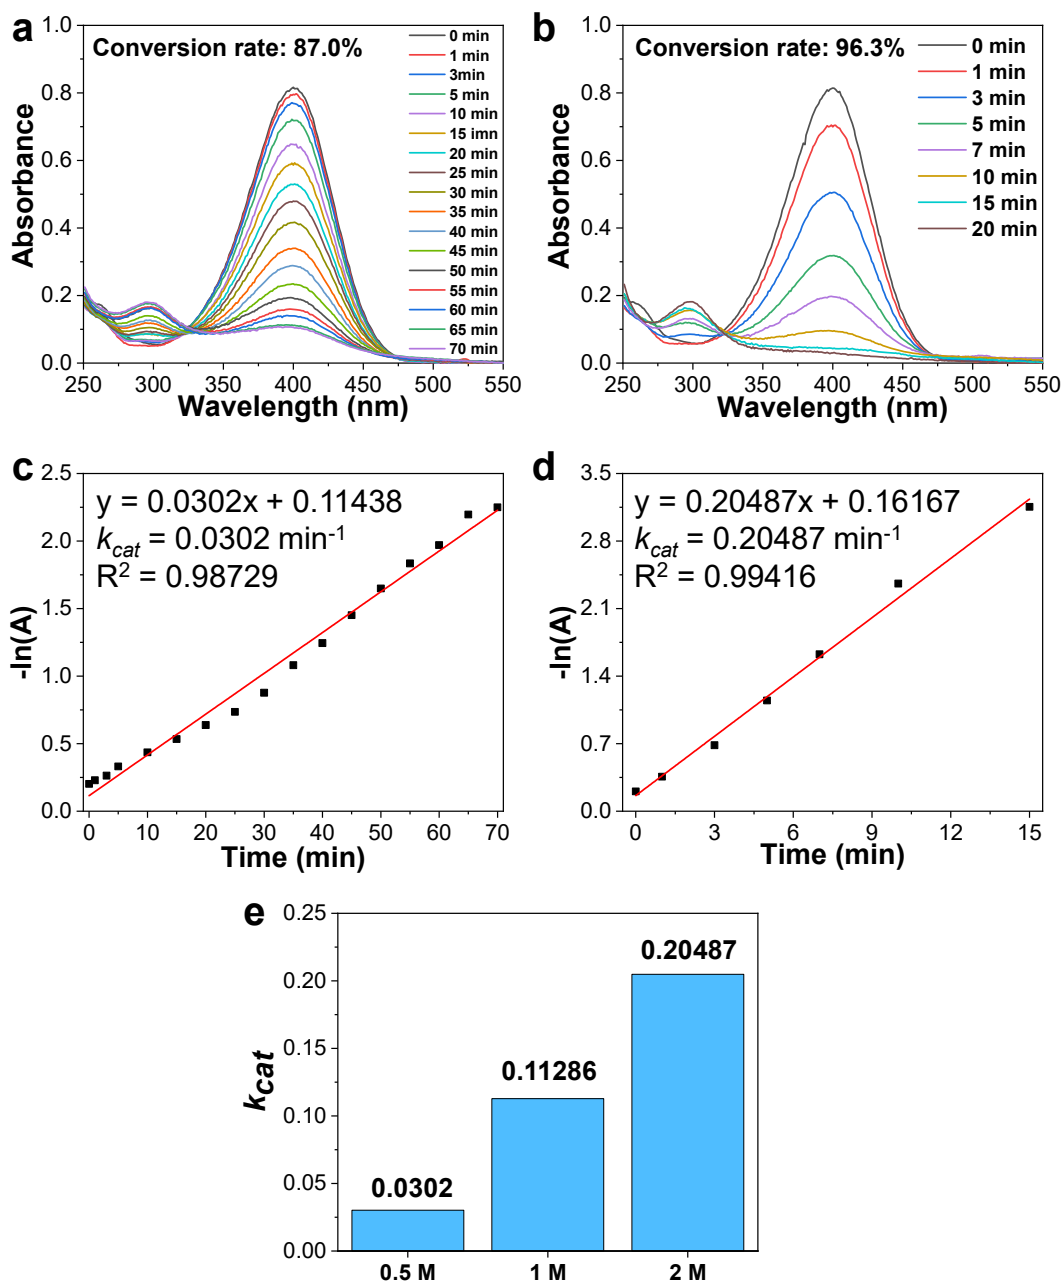

**Fig. S8** UV-vis spectra of the catalytic reaction solution using (a) 0.5 and (b) 2 M NaBH<sub>4</sub> solutions with AgNP/PG@PEI-GO (wet) film as a function of reaction time. Kinetic analysis of the catalytic reaction using (c) 0.5 and (d) 2 M NaBH<sub>4</sub> solutions. (e) Rate constant of catalytic reaction as a function of NaBH<sub>4</sub> concentrations.

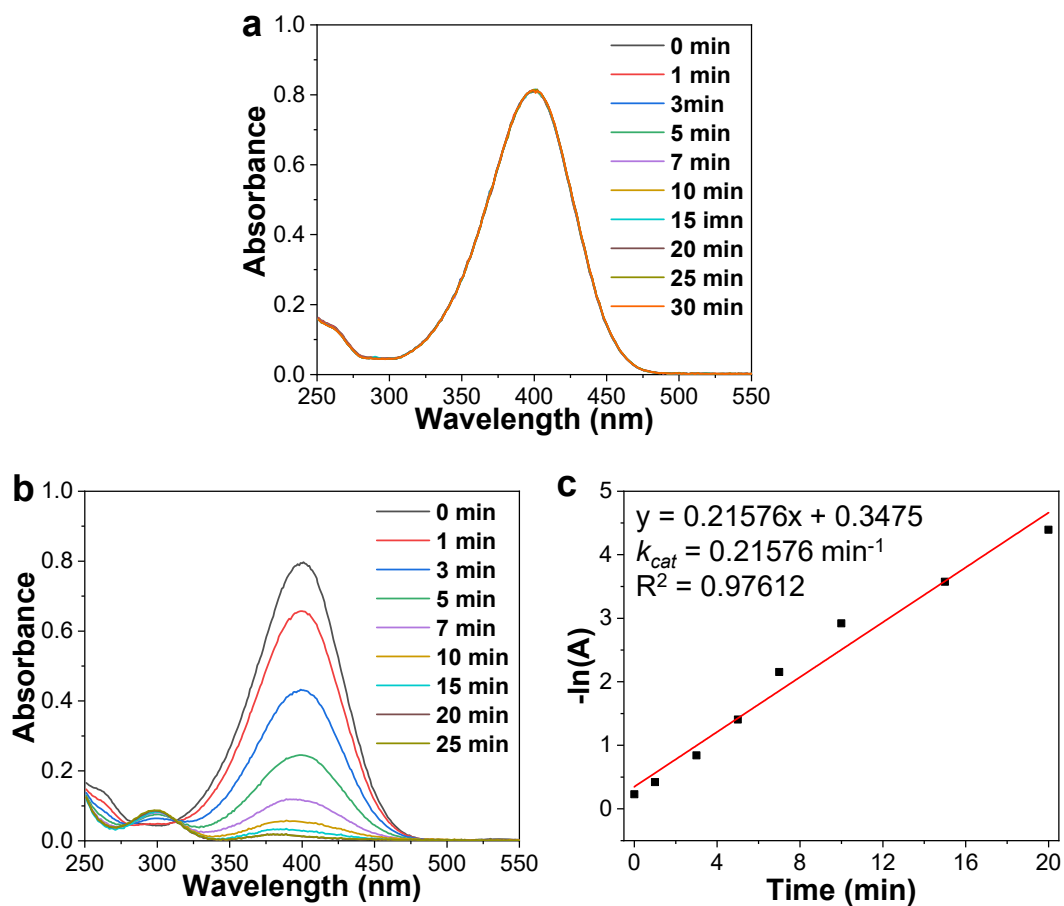

**Fig. S9** UV-vis spectra of the catalytic reaction solution with (a) PG@PEI-GO (wet) film and (b) AgNP colloidal solution as a function of reaction time. (c) Kinetic analysis of the catalytic reaction using AgNP colloidal solution.

| <b>No.</b> | <b>Catalytic materials</b>               | <b>Structures</b> | <b><math>k_{cat}</math> (min<sup>-1</sup>)</b>                       | <b>References</b> |
|------------|------------------------------------------|-------------------|----------------------------------------------------------------------|-------------------|
| <b>1</b>   | AuNP/GO/CNT                              | film              | 0.0402                                                               | 1                 |
| <b>2</b>   | AuNP/activated carbon                    | membrane          | 0.0296                                                               | 2                 |
| <b>3</b>   | AuNP/CNT                                 | membrane          | 0.277                                                                | 3                 |
| <b>4</b>   | AuNC/CNT                                 | membrane          | 0.2                                                                  | 4                 |
| <b>5</b>   | PdNP/PAA/PVA/CNT                         | film              | 0.43                                                                 | 5                 |
| <b>6</b>   | AgNP/nanocellulose                       | membrane          | 0.195                                                                | 6                 |
| <b>7</b>   | AgNP/PVA/RGO                             | film              | 0.048                                                                | 7                 |
| <b>8</b>   | PtNP/CNF-PEI                             | aerogel           | 0.12                                                                 | 8                 |
| <b>9</b>   | AuNP/CNT                                 | fiber             | 0.105                                                                | 9                 |
| <b>10</b>  | AgNP/g-C <sub>3</sub> N <sub>4</sub> /PE | fabric            | 0.462                                                                | 10                |
| <b>11</b>  | AgNP/GO/P4VP/PAA                         | hydrogel          | 0.977                                                                | 11                |
| <b>12</b>  | AgNP/PG@PEI-GO                           | film              | 0.11286 (1 M NaBH <sub>4</sub> )<br>0.20487 (2 M NaBH <sub>4</sub> ) | This work         |

**Table S1.** Comparison of the rate constant with other reported catalysts using noble metal catalysts supported on structural materials.

## References

- (1) F. Yang, C. Wang, L. Wang, C. Liu, A. Feng, X. Liu, C. Chi, X. Jia, L. Zhang and Y. Li, *RSC Adv.*, 2015, **5**, 37710–37715.
- (2) S. Bolisetty and R. Mezzenga, *Nat. Nanotechnol.*, 2016, **11**, 365–371.
- (3) Q. Zhang, X. Fan, H. Wang, S. Chen and X. Quan, *RSC Adv.*, 2016, **6**, 41114–41121.
- (4) Y. Liu, Y. Zheng, B. Du, R. R. Nasaruddin, T. Chen and J. Xie, *Ind. Eng. Chem. Res.*, 2017, **56**, 2999–3007.
- (5) R. Wang, Q. Liu, T. Jiao, J. Li, Y. Rao, J. Su, Z. Bai and Q. Peng, *ACS Omega*, 2019, **4**, 8480–8486.
- (6) T. K. Das, S. Remanan, S. Ghosh and N. C. Das, *J. Environ. Chem. Eng.*, 2021, **9**, 104596
- (7) K. Sharma, S. Majhi, M. Ali, R. Singh, C. Shekhar Pati Tripathi and D. Guin, *ChemistrySelect*, 2021, **6**, 6071–6076.
- (8) H. Yu, S. Oh, Y. Han, S. Lee, H. S. Jeong and H. J. Hong, *Chemosphere*, 2021, **285**, 131448
- (9) Y. K. Kim, Y. J. Kim, J. Park, S. W. Han and S. M. Kim, *Carbon*, 2021, **173**, 376–383.
- (10) A. Amedlous, M. Majdoub, Z. Anfar and E. Amaterz, *Catalysts*, 2021, **11**, 1533
- (11) L. Zhang, L. Sun, T. Su, T. Chen, L. Hu, F. He and H. Xu, *Colloids Surfaces A Physicochem. Eng. Asp.*, 2022, **640**, 128410
